# Supplementary material
Source: publisher figshare collection journal article supplement (https://karger.figshare.com/ndownloader/files/14100893)
Supplement: Supplementary file 1 [file 14100893]

Figure S1

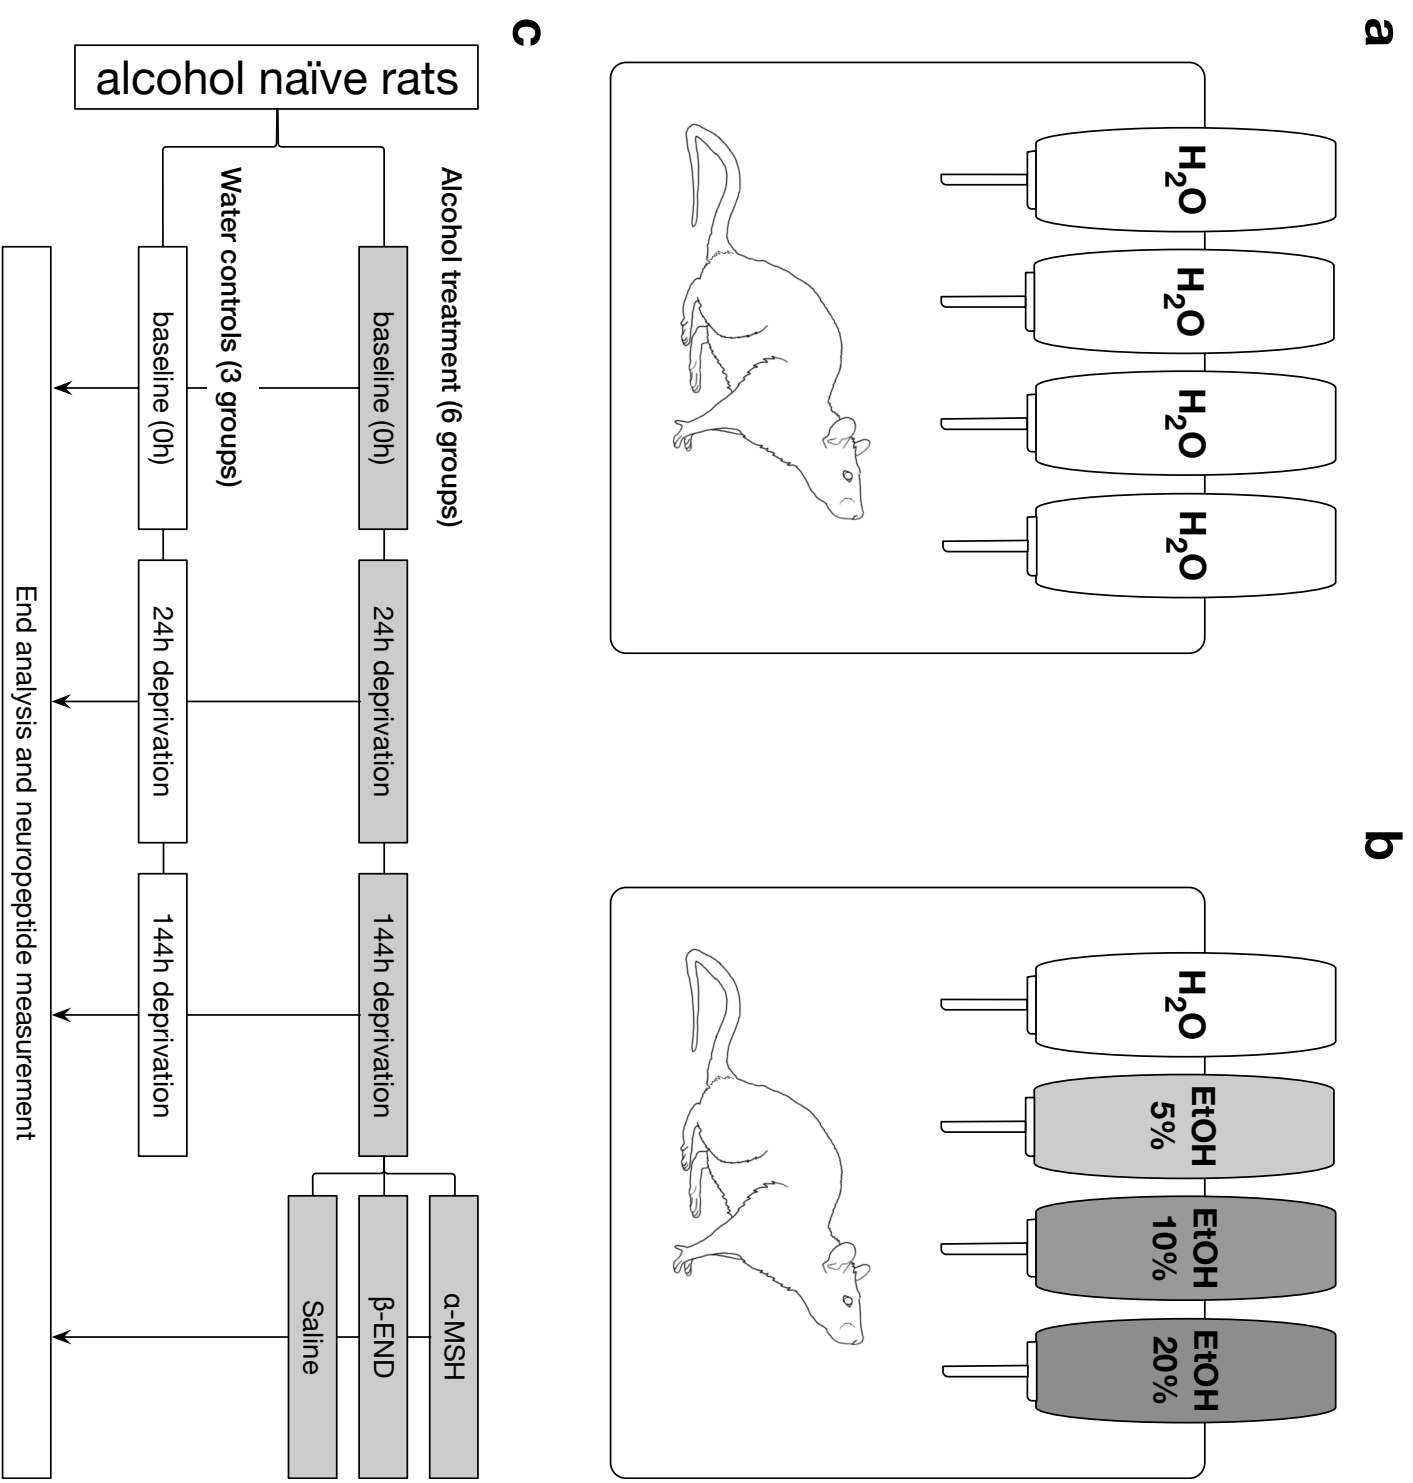

**DNA methylation of the Leptin-gene-promoter is altered by chronic alcohol exposure in an animal model for alcohol dependence.**

### **Supplementary Figure Legend**

#### **Supplementary Figure S1:**

**a and b)** Pictogram illustrating the four-bottle-paradigm for alcohol dependence in rodents. Control animals (water-drinking) (a) and alcohol-consuming animals (b).

**c)** Pictogram illustrating the scheduled timepoints of sample collection of the present rodent study.

# DNA methylation of the Leptin-gene-promoter is altered by chronic alcohol exposure in an animal model for alcohol dependence.

## a) ANOVA

Leptin levels of treated groups (Alpha-MSH, Beta-Endorphin, Saline)

|                | Sum of Squares | df | Mean Square  | F     | Sig.  |
|----------------|----------------|----|--------------|-------|-------|
| Between Groups | 70145900,690   | 2  | 35072950,345 | 0,514 | 0,604 |
| Within Groups  | 1774701520,000 | 26 | 68257750,769 |       |       |
| Total          | 1844847420,690 | 28 |              |       |       |

## b) ANOVA

Leptin levels of water, 0h, 24h and 6 days group

|                | Sum of Squares | df | Mean Square  | F     | Sig.  |
|----------------|----------------|----|--------------|-------|-------|
| Between Groups | 193448318,750  | 5  | 38689663,750 | 0,988 | 0,436 |
| Within Groups  | 1802089075,000 | 46 | 39175849,457 |       |       |
| Total          | 1995537393,750 | 51 |              |       |       |

## c) ANOVA

Weight of all groups

|                | Sum of Squares | df | Mean Square | F     | Sig.  |
|----------------|----------------|----|-------------|-------|-------|
| Between Groups | 120260,562     | 8  | 15032,570   | 1,347 | 0,235 |
| Within Groups  | 814949,694     | 73 | 11163,694   |       |       |
| Total          | 935210,256     | 81 |             |       |       |

## d) ANOVA

EtOH of treated groups (Alpha-MSH, Beta-Endorphin, Saline)

|                | Sum of Squares | df | Mean Square | F     | Sig.  |
|----------------|----------------|----|-------------|-------|-------|
| Between Groups | 1,102          | 2  | 0,551       | 0,595 | 0,560 |
| Within Groups  | 21,307         | 23 | 0,926       |       |       |
| Total          | 22,410         | 25 |             |       |       |

**DNA methylation of the Leptin-gene-promoter is altered by chronic alcohol exposure in an animal model for alcohol dependence.**

**Supplementary ANOVA Legend:**

- a) ANOVA: Comparison of group-means of leptin levels between treated animal groups (Alpha-MSH, Beta-Endorphin, Saline)
- b) ANOVA: Comparison of group-means of leptin levels between water groups (pooled to one control groups as described in the results section) and alcohol groups (0h, 24h and 6d)
- c) ANOVA: Comparison of group-means of weight between all animal groups (water, 0h, 24h, 6d, Alpha-MSH, Beta-Endorphin and Saline)
- d) ANOVA: Comparison of group-means of ethanol consumption of all treated animal groups (Alpha-MSH, Beta-Endorphin, Saline)

**Supplementary Table 1**

**DNA methylation of the Leptin-gene-promoter is altered by chro**

| Name   | Sequence                           |
|--------|------------------------------------|
| rLepF1 | TTT TTG GTT GGT TTT GAG GG         |
| rLepR2 | GGA GAG TAG GTG GTT GTT AGG TGA AT |
| rLepF2 | TAA GTT TTT GTT ATT TGT TTT TGG A  |

ENSEMBL# ENSRNOG00000045797  
Chromosome: Rnor\_6.0 4 56334695:56352418

## nic alcohol exposure in an animal model for alcohol dependence

| Gene                                         | fragment size |
|----------------------------------------------|---------------|
| Leptin - 1. PCR                              | 725bp         |
| Leptin - First PCR / second (seminested) PCR |               |
| Leptin - Second (seminested) PCR / Seq PCR   |               |

Leptin found in Ensembl Genome Browser / [www.ensembl.org](http://www.ensembl.org)

Leptin position on chromosome 4

**DNA methylation of the Leptin-gene-promoter is altered by chronic alcohol exposure in an animal model for alcohol dependence.**

## **Supplementary Table Legend**

### **Supplementary Table 1:**

Supplementary Table shows the oligonucleotide sequences used for PCR and as sequencing primer as indicated. Leptin genomic sequence can be found in Ensembl Genome Browser using the indicated accession number: ENSRNOG00000045797. There is additional information about Leptin's position on Chromosome 4: 56334695:56352418.
